# Supplementary material for: Resistance to Anti-VEGF Therapy Mediated by Autocrine IL6/STAT3 Signaling and Overcome by IL6 Blockade
Source: Oxford University Press journal article supplement (doi:10.1158/0008-5472.can-15-1443), 2016-02-26
Supplement: 00085472can151443-sup-150339_2_supp_3257399_nyzx64.doc [file 00085472can151443-sup-150339_2_supp_3257399_nyzx64.doc]

**SUPPLEMENTAL EXPERIMENTAL PROCEDURES**

**Tumor cells and cell culture**

Tumor cells including A498 human kidney carcinoma, Colo205 human colorectal adenocarcinoma and 786-0 human renal adenocarcinoma were obtained from the American Type Culture Collection (ATCC) and grown according to ATCC guidelines. All cell lines were authenticated between 2012 and 2015 using the STR Profile Testing by ATCC. Colo205 tumor cells were cultured in RPMI 1640 with 10% FBS and L-glutamine–penicillin–streptomycin, non-essential amino acids, sodium pyruvate, and 786-0 were cultured in RPMI 1640 with 10% FBS and L-glutamine–penicillin–streptomycin, HEPES, sodium pyruvate.

**Generation of CXCL-1 overexpressing A431 tumor cells**

Lentiviral pLOC vector encoding human CXCL-1 and TurboGFP(nuc) reporter genes were purchased from Thermo Scientific and packaged per manufacturer's instructions. A431 carcinoma cells were incubated with pLOC-CXCL-1 lentivirus particles for 48 hours and transduction rate was examined using fluorescent microscopy to detect expression of GFP reporter. Virally transduced cells expressing TurboGFP(nuc) reporter were isolated by two rounds of flow cytometric cell sorting.

***In vivo* tumor studies**

Tumor studies were performed in accordance with Regeneron’s Institutional Animal Care and Use Committee guidelines. 1x106 Colo205, A498 or 786-0 cells were implanted s.c. into the lower right flank of male CB.17 SCID mice (Taconic, New York). Tumor volume was assessed with calipers using the LxW2/2 formula. When tumors reached approximately 100-200 mm3 in size, mice were randomized into different groups and treated by s.c. injection with hFc (control protein, 25 mg/kg), aflibercept (VEGF Trap, 25 mg/kg). Treatments occurred 2x per week and mice were monitored closely for tumor growth as well as overall health throughout experiments. Tumor growth curves were presented as an average mean +/- standard deviation (SD).

**SILAC labeling and Secretome Preparation**

A431-P and A431-V cells were cultured in DMEM medium (AthenaES, Baltimore, MD) supplemented with 10% dialyzed fetal bovine serum (Thermo) and 1 X penicillin/streptomycin (Gibco). For SILAC labeling, arginine and lysine were added in either light (Arg0; Lys0) or heavy (Arg6; Lys8) to a final concentration 0.40 mM for arginine and 0.80 mM for lysine. Prior to harvest, cells were grown for 5 passages in SILAC medium and tested for full incorporation. The conditioned medium containing the secretome of A431-V or A431-P cells was collected after serum starvation in serum-free heavy or light DMEM medium for 16hours**.** Floating cells and cellular debris were removed by centrifugation (1000 x g, 10 min). For SILAC MS analysis, the collected media were subsequently concentrated and desalted by ultrafiltration using Amicon Ultra-15 (MWCO 3K; Millipore) according to the manufacturer’s instructions. Protein concentration was measured using BCA protein assay (Pierce). Equal amounts of proteins from heavy and light concentrated supernatants were combined in one tube. The pooled sample was then subjected to acetone precipitation overnight prior to being resolved on a 10-14% SDS-PAGE gel. The gel was fixed and stained using SimplyBlue (Invitrogen). Each lane was cut into 15 sections, and each section was digested via standard in-gel digestion protocols . Briefly, the gel sections were de-stained in 50:50 acetonitrile: NH4HCO3, reduced with 65 mM dithiothreitol (Sigma) at 37 °C for 30 min followed by alkylation with 130 mM iodoacetamide (Sigma) at room temperature in dark for 30 min. Subsequently, proteins were digested overnight with sequencing grade modified porcine trypsin (Promega) at 37 °C.

**NanoLC MALDI-TOF/TOF Analysis**

Peptides from in-gel trypsin digestion were extracted twice with extraction buffer (50% ACN, 5% formic acid in H2O). The extracted peptides from each section were dried in a SpeedVac concentrator and reconstituted with 0.1% tetrafluoroacetic acid (TFA, Burdick & Jackson). The peptides were first loaded onto a trap column (Acclaim Pepmap 100, 100 μm x 1 cm, C18, 5 μm, 100 Å; Dionex) at a flow rate of 0.13 μl/min in buffer A (0.1% TFA) for 10 min. The trapped peptides were subsequently eluted and separated on a C18 column (Zorbax 300SB-C18, 3.5 μm, 150 mm x 75 mm; Agilent) using a linear gradient of 3% to 38% buffer B (90% ACN, 0.1% TFA) for 96 min with a flow rate of 0.32 μl/min. The LC apparatus was coupled with a Shimadzu AccuSpot spotter, and spots were deposited on a Bruker Anchorchip MALDI plate with an interval of 15 s. The peptide spots were analyzed by MALDI-TOF/TOF MS on a Bruker Ultraflex II TOF/TOF instrument (Bruker Daltonics, Bremen, Germany). The MS and MS/MS peak lists were extracted by MASCOT Distiller and searched via MASCOT (version: 2012_01) within the human taxonomy of the Swiss-Prot database (containing 20317 sequences). All searches assumed trypsin digestion with up to 1 miss cleavage, and considered carboxymethylation of cysteine as a fixed modification and oxidation of methionine as a variable modification. “SILAC K+8 and R+6” were selected in the quantitation dialogue window. A peptide mass tolerance of 50 ppm and MS/MS mass tolerance of 1.0 Da were used. Peptide identifications made against the decoy (reversed) protein sequences were used to define false discovery rate (FDRs) . Minimum Mascot protein score threshold was determined to afford a less than 1% protein-level FDR for each band (protein score of 45). All mass spectrometry data of regulated proteins were manually inspected and validated. To normalize protein ratios (heavy/light), all protein ratios were transformed to log2 values.

**Immunohistochemistry and image analysis**

OCT embedded tumors were cut into 30 µm frozen sections. Tissue was air dried, 10 min fixed in acetone (-20 °C), avidin-biotin blocked (Vector), blocked in 2.5 % normal goat serum / 1 % BSA/PBS for 30-45 min (room temperature), incubated for 16 h at 4 °C with rat anti-murine CD31 Ab (1:50; BD) diluted in 0.5x block followed by a 45 min (room temperature) incubation with a biotinylated anti-rat antibody (1:150; Vector). Antigens were revealed with 3,3’-diaminobenzidine (DAB, Sigma).

For analysis photomicrographs were acquired at 2.5x magnification. Vessel density was determined using NIH image software.

**TaqMan:**

Total RNA was purified from cells using MagMAX-96 for Microarrays Total RNA Isolation Kit (Ambion) according to manufacturer’s specifications. Up to 2.5 μg mRNA was reverse-transcribed into cDNA using SuperScript VILO Master Mix (Invitrogen). Subsequently, cDNA was diluted to 5 ng/μl, and 25 ng cDNA was amplified with the TaqMan Gene Expression Master Mix (Applied Biosystems) using the ABI 7900HT Sequence Detection System (Applied Biosystems). Beta-actin was used as an internal control gene to normalize any cDNA input differences. The reference group was the average of all the A431-P cell samples (three biological replicates) without any treatment.

hSAA-1 gene:

probe sequence: CTGGCTGATCAGGCTGCCAATGA

forward primer: CCATGGTGCGGAGGACTC

reverse primer: CAGCAGGTCGGAAGTGATTGG

hLCN2 (NGAL) gene:

probe sequence: TCGGAACTAAAGGAGAACTTCATCCGC

forward primer: TCTACGGGAGAACCAAGGA

reverse primer: GAGGCCCAGAGATTTGGAGAA.

hß-actin gene:

probe sequence: CAAGATCATTGCTCCTCCTGAGCGC

forward Primer: GGCACCCAGCACAATGAAG

reverse Primer: GCCGATCCACACGGAGTA

**SUPPLEMENTAL FIGURE LEGENDS AND FIGURES**

**Supplemental Figure S1: A431 tumors showed evidence of late escape, while Colo205, A498 and 786-0 did not.**

Tumors were grown to approximately 100 mm3 and then treated twice per week with aflibercept (25 mg/kg) for up to 7 weeks. Shown are the average tumor volume (± SD) and the individual tumor volume for A431 (A), Colo205 (B), A498 (C), and 786-0 (D) tumors. Only A431 tumors showed evidence of late escape, defined as a tumor showing an increase of 40% or more in tumor volume between day 42 and 49 of treatment. The two individual A431 tumors that showed late escape are marked with an asterisk next to the curve.

**Supplemental Figure S2: Effects of aflibercept on A431-P and A431-V tumor cell proliferation and vasculature.**

1. Representative images of tumor cell proliferation assessed by Ki-67 immunohistochemistry in A431-P and A431-V tumors treated with human Fc control protein or aflibercept for 24 hours. Scale bar = 100 µm.
2. Representative images of tumor vessel density assessed by CD31 immunohistochemistry in A431-P and A431-V tumors treated with human Fc control protein or aflibercept for 14 days. Scale bar = 100 µm.
3. Quantitative analysis of CD31 immunohistochemistry in A431-P and A431-V tumors treated with human Fc control protein or aflibercept for 14 days. * P < 0.05, *** P < 0.001, **** P < 0.0001 one-way ANOVA with Bonferroni’s post-hoc test.

**Supplemental Figure S3: Quantitative secretome profiling identifies deregulated expressions of proteins released from aflibercept resistant cells**

1. Overview of secretome SILAC workflow. Aflibercept-sensitive A431-P and aflibercept-resistant A431-V cells were grown in SILAC ‘light’ and’ heavy’ media, respectively. Equal amounts of proteinfrom both concentrated cell supernatants were mixed followed by GeLC-MS analysis.
2. Distribution of SILAC quantified proteins. Normalization of each protein ratio was performed by subtracting the mean of the total log2SILAC ratios from individual protein log2SILAC ratio. A “2.0 fold change“ cutoff was chosen to define up- or down-regulated proteins (log2SILACratio ≥ 1.0 or ≤ -1.0).
3. TagMan qRT-PCR results showing increased mRNA levels of NGAL and SAA in A431-P cells upon exposure to A431-V conditioned media for 24 hours.

**Supplemental Figure S4: Overexpression of CXCL-1 did not render A431 tumors resistant to aflibercept**

1. A431 tumor cells were engineered to overexpress CXCL-1 and tumor growth kinetics and aflibercept response was compared to A431 empty vector tumors for 17 days. The average tumor volume ± SD is plotted over the course of treatment.
2. Tumor growth changes of CXCL-1 or empty vector expressing tumors in response to human Fc control protein or aflibercept from start of treatment. * p<0.05; ** P < 0.01 one-way ANOVA, Bonferroni post-hoc test.

**Supplemental Figure S5: Ingenuity Pathway Analysis (IPA) analysis reveals two upregulated networks in A431-V tumors**

1. IPA calculated top network 1
2. IPA calculated top network 2

IPA analysis reveals that the top two networks contained a large fraction of the altered proteins associated with IL-6, IL-8 and IL-1a pathways. Red: upregulated protein; green: downregulated protein.

**Supplemental Figure S6: IL-6 overexpression in A431-V tumors accelerates tumor growth but results in dramatic weight loss of tumor-bearing mice**

1. A431 tumor cells were engineered to overexpress IL-6 and tumor growth kinetics were compared to A431 empty vector control tumors. * p<0.05 last data point (day 14) compared to empty vector control, two-way ANOVA with Bonferroni post-hoc test
2. Growth of IL-6 overexpressing A431 tumors induces weight loss and morbidity in mice independent of aflibercept treatment
