# Supplementary material for: Resistance to Anti-VEGF Therapy Mediated by Autocrine IL6/STAT3 Signaling and Overcome by IL6 Blockade
Source: Oxford University Press journal article supplement (doi:10.1158/0008-5472.can-15-1443), 2016-02-26
Supplement: 00085472can151443-sup-150339_2_supp_3257483_nyzx7f.doc [file 00085472can151443-sup-150339_2_supp_3257483_nyzx7f.doc]

**Table S1: SILAC-based identification of up- and down-regulated protein secretion by A431-V compared to A431-P cells**

| **Up-regulated secreted proteins from A431-V cells identified by SILAC** | | | | | | | |
| --- | --- | --- | --- | --- | --- | --- | --- |
|  | **Accession** | **Description** | **Score** | **Mass (Da)** | **# of H/L** | **Log2(H/L)** | **Ratio** |
| 1 | FUCO2_HUMAN | Plasma alpha-L-fucosidase OS=Homo sapiens GN=FUCA2 PE=1 SV=2 | 238 | 54374 | 4 | 9.51 | 726.8 |
| 2 | GROA_HUMAN | Growth-regulated alpha protein OS=Homo sapiens GN=CXCL1 PE=1 SV=1 | 205 | 11629 | 3 | 5.70 | 51.9 |
| 3 | ELAF_HUMAN | Elafin OS=Homo sapiens GN=PI3 PE=1 SV=3 | 246 | 12830 | 4 | 5.39 | 42.0 |
| 4 | CXCL2_HUMAN | C-X-C motif chemokine 2 OS=Homo sapiens GN=CXCL2 PE=1 SV=1 | 122 | 11726 | 1 | 5.27 | 38.5 |
| 5 | SAA_HUMAN | Serum amyloid A protein OS=Homo sapiens GN=SAA1 PE=1 SV=2 | 598 | 13681 | 4 | 5.07 | 33.6 |
| 6 | A1AT_HUMAN | Alpha-1-antitrypsin OS=Homo sapiens GN=SERPINA1 PE=1 SV=3 | 216 | 47193 | 3 | 4.82 | 28.3 |
| 7 | WFDC2_HUMAN | WAP four-disulfide core domain protein 2 OS=Homo sapiens GN=WFDC2 PE=1 SV=2 | 110 | 14011 | 2 | 4.71 | 26.1 |
| 8 | CSTN3_HUMAN | Calsyntenin-3 OS=Homo sapiens GN=CLSTN3 PE=1 SV=1 | 57 | 108042 | 1 | 4.22 | 18.7 |
| 9 | S10A7_HUMAN | Protein S100-A7 OS=Homo sapiens GN=S100A7 PE=1 SV=4 | 141 | 11578 | 2 | 4.12 | 17.4 |
| 10 | CFAB_HUMAN | Complement factor B OS=Homo sapiens GN=CFB PE=1 SV=2 | 253 | 87501 | 4 | 3.91 | 15.1 |
| 11 | CFAH_HUMAN | Complement factor H OS=Homo sapiens GN=CFH PE=1 SV=4 | 110 | 144653 | 1 | 3.00 | 8.0 |
| 12 | IL8_HUMAN | Interleukin-8 OS=Homo sapiens GN=IL8 PE=1 SV=1 | 132 | 11492 | 2 | 2.90 | 7.5 |
| 13 | CO3_HUMAN | Complement C3 OS=Homo sapiens GN=C3 PE=1 SV=2 | 2259 | 189969 | 41 | 2.89 | 7.4 |
| 14 | MMP9_HUMAN | Matrix metalloproteinase-9 OS=Homo sapiens GN=MMP9 PE=1 SV=3 | 60 | 79963 | 2 | 2.83 | 7.1 |
| 15 | IL1A_HUMAN | Interleukin-1 alpha OS=Homo sapiens GN=IL1A PE=1 SV=1 | 87 | 30963 | 1 | 2.80 | 6.9 |
| 16 | NEO1_HUMAN | Neogenin OS=Homo sapiens GN=NEO1 PE=1 SV=2 | 92 | 161600 | 2 | 2.80 | 6.9 |
| 17 | FINC_HUMAN | Fibronectin OS=Homo sapiens GN=FN1 PE=1 SV=4 | 2944 | 267430 | 48 | 2.57 | 5.9 |
| 18 | IL36G_HUMAN | Interleukin-36 gamma OS=Homo sapiens GN=IL36G PE=1 SV=1 | 45 | 19052 | 1 | 2.42 | 5.3 |
| 19 | NGAL_HUMAN | Neutrophil gelatinase-associated lipocalin OS=Homo sapiens GN=LCN2 PE=1 SV=2 | 1298 | 22745 | 13 | 2.40 | 5.3 |
| 20 | S10A9_HUMAN | Protein S100-A9 OS=Homo sapiens GN=S100A9 PE=1 SV=1 | 98 | 13291 | 2 | 2.18 | 4.5 |
| 21 | INHBA_HUMAN | Inhibin beta A chain OS=Homo sapiens GN=INHBA PE=1 SV=2 | 134 | 48641 | 2 | 2.17 | 4.5 |
| 22 | LEG1_HUMAN | Galectin-1 OS=Homo sapiens GN=LGALS1 PE=1 SV=2 | 625 | 15048 | 5 | 2.12 | 4.4 |
| 23 | T132A_HUMAN | Transmembrane protein 132A OS=Homo sapiens GN=TMEM132A PE=2 SV=1 | 435 | 111623 | 7 | 2.10 | 4.3 |
| 24 | S10A8_HUMAN | Protein S100-A8 OS=Homo sapiens GN=S100A8 PE=1 SV=1 | 211 | 10993 | 5 | 2.08 | 4.2 |
| 25 | C1S_HUMAN | Complement C1s subcomponent OS=Homo sapiens GN=C1S PE=1 SV=1 | 341 | 78627 | 7 | 2.08 | 4.2 |
| 26 | KLK6_HUMAN | Kallikrein-6 OS=Homo sapiens GN=KLK6 PE=1 SV=1 | 400 | 27523 | 5 | 1.99 | 4.0 |
| 27 | RNAS7_HUMAN | Ribonuclease 7 OS=Homo sapiens GN=RNASE7 PE=1 SV=2 | 82 | 17921 | 1 | 1.97 | 3.9 |
| 28 | STC2_HUMAN | Stanniocalcin-2 OS=Homo sapiens GN=STC2 PE=1 SV=1 | 521 | 34321 | 8 | 1.95 | 3.9 |
| 29 | MINP1_HUMAN | Multiple inositol polyphosphate phosphatase 1 OS=Homo sapiens GN=MINPP1 PE=1 SV=1 | 53 | 55643 | 1 | 1.95 | 3.9 |
| 30 | PTHR_HUMAN | Parathyroid hormone-related protein OS=Homo sapiens GN=PTHLH PE=1 SV=1 | 108 | 20491 | 1 | 1.88 | 3.7 |
| 31 | PLOD2_HUMAN | Procollagen-lysine,2-oxoglutarate 5-dioxygenase 2 OS=Homo sapiens GN=PLOD2 PE=1 SV=2 | 488 | 85988 | 5 | 1.87 | 3.6 |
| 32 | FBX2_HUMAN | F-box only protein 2 OS=Homo sapiens GN=FBXO2 PE=1 SV=2 | 54.8 | 33300 | 2 | 1.86 | 3.6 |
| 33 | MFAP2_HUMAN | Microfibrillar-associated protein 2 OS=Homo sapiens GN=MFAP2 PE=2 SV=1 | 78 | 21553 | 3 | 1.85 | 3.6 |
| 34 | SLPI_HUMAN | Antileukoproteinase OS=Homo sapiens GN=SLPI PE=1 SV=2 | 151 | 15228 | 2 | 1.85 | 3.6 |
| 35 | LAMC2_HUMAN | Laminin subunit gamma-2 OS=Homo sapiens GN=LAMC2 PE=1 SV=2 | 4473 | 134769 | 48 | 1.84 | 3.6 |
| 36 | LOXL2_HUMAN | Lysyl oxidase homolog 2 OS=Homo sapiens GN=LOXL2 PE=1 SV=1 | 348 | 88778 | 4 | 1.80 | 3.5 |
| 37 | SEM7A_HUMAN | Semaphorin-7A OS=Homo sapiens GN=SEMA7A PE=1 SV=1 | 72 | 76333 | 3 | 1.77 | 3.4 |
| 38 | TSP2_HUMAN | Thrombospondin-2 OS=Homo sapiens GN=THBS2 PE=1 SV=2 | 1002 | 134481 | 19 | 1.77 | 3.4 |
| 39 | FST_HUMAN | Follistatin OS=Homo sapiens GN=FST PE=1 SV=2 | 485 | 40148 | 4 | 1.75 | 3.4 |
| 40 | AGRIN_HUMAN | Agrin OS=Homo sapiens GN=AGRN PE=1 SV=4 | 4678 | 222861 | 47 | 1.74 | 3.3 |
| 41 | CATB_HUMAN | Cathepsin B OS=Homo sapiens GN=CTSB PE=1 SV=3 | 1463 | 38766 | 14 | 1.73 | 3.3 |
| 42 | C1R_HUMAN | Complement C1r subcomponent OS=Homo sapiens GN=C1R PE=1 SV=2 | 997 | 82106 | 16 | 1.72 | 3.3 |
| 43 | TSP3_HUMAN | Thrombospondin-3 OS=Homo sapiens GN=THBS3 PE=1 SV=1 | 90 | 106872 | 2 | 1.66 | 3.2 |
| 44 | CBPE_HUMAN | Carboxypeptidase E OS=Homo sapiens GN=CPE PE=1 SV=1 | 198 | 53516 | 4 | 1.66 | 3.2 |
| 45 | SODM_HUMAN | Superoxide dismutase [Mn], mitochondrial OS=Homo sapiens GN=SOD2 PE=1 SV=2 | 763 | 24878 | 5 | 1.62 | 3.1 |
| 46 | SPB4_HUMAN | Serpin B4 OS=Homo sapiens GN=SERPINB4 PE=1 SV=2 | 103 | 44997 | 2 | 1.61 | 3.1 |
| 47 | SPB3_HUMAN | Serpin B3 OS=Homo sapiens GN=SERPINB3 PE=1 SV=2 | 116 | 44594 | 2 | 1.57 | 3.0 |
| 48 | DLL1_HUMAN | Delta-like protein 1 OS=Homo sapiens GN=DLL1 PE=2 SV=2 | 160 | 81995 | 2 | 1.56 | 2.9 |
| 49 | IBP7_HUMAN | Insulin-like growth factor-binding protein 7 OS=Homo sapiens GN=IGFBP7 PE=1 SV=1 | 1801 | 30354 | 16 | 1.56 | 2.9 |
| 50 | SULF2_HUMAN | Extracellular sulfatase Sulf-2 OS=Homo sapiens GN=SULF2 PE=1 SV=1 | 184 | 101759 | 4 | 1.51 | 2.8 |
| 51 | DTD1_HUMAN | D-tyrosyl-tRNA(Tyr) deacylase 1 OS=Homo sapiens GN=DTD1 PE=1 SV=2 | 52 | 23580 | 1 | 1.42 | 2.7 |
| 52 | EPN4_HUMAN | Clathrin interactor 1 OS=Homo sapiens GN=CLINT1 PE=1 SV=1 | 91 | 68273 | 1 | 1.42 | 2.7 |
| 53 | TGFB2_HUMAN | Transforming growth factor beta-2 OS=Homo sapiens GN=TGFB2 PE=1 SV=1 | 119 | 48981 | 1 | 1.42 | 2.7 |
| 54 | TEN2_HUMAN | Teneurin-2 OS=Homo sapiens GN=ODZ2 PE=1 SV=3 | 65 | 313879 | 1 | 1.41 | 2.7 |
| 55 | PLSL_HUMAN | Plastin-2 OS=Homo sapiens GN=LCP1 PE=1 SV=6 | 851 | 70814 | 12 | 1.38 | 2.6 |
| 56 | TSP1_HUMAN | Thrombospondin-1 OS=Homo sapiens GN=THBS1 PE=1 SV=2 | 3534 | 133291 | 38 | 1.38 | 2.6 |
| 57 | TRFM_HUMAN | Melanotransferrin OS=Homo sapiens GN=MFI2 PE=1 SV=2 | 81 | 82219 | 3 | 1.37 | 2.6 |
| 58 | CO7A1_HUMAN | Collagen alpha-1(VII) chain OS=Homo sapiens GN=COL7A1 PE=1 SV=2 | 75 | 298062 | 3 | 1.34 | 2.5 |
| 59 | AP2S1_HUMAN | AP-2 complex subunit sigma OS=Homo sapiens GN=AP2S1 PE=1 SV=2 | 79 | 17178 | 3 | 1.32 | 2.5 |
| 60 | KLK5_HUMAN | Kallikrein-5 OS=Homo sapiens GN=KLK5 PE=1 SV=2 | 522 | 32990 | 5 | 1.28 | 2.4 |
| 61 | COIA1_HUMAN | Collagen alpha-1(XVIII) chain OS=Homo sapiens GN=COL18A1 PE=1 SV=5 | 78 | 179389 | 1 | 1.27 | 2.4 |
| 62 | JAG1_HUMAN | Protein jagged-1 OS=Homo sapiens GN=JAG1 PE=1 SV=3 | 288 | 141179 | 5 | 1.24 | 2.4 |
| 63 | ITGBL_HUMAN | Integrin beta-like protein 1 OS=Homo sapiens GN=ITGBL1 PE=2 SV=1 | 280 | 58836 | 3 | 1.23 | 2.3 |
| 64 | MYH11_HUMAN | Myosin-11 OS=Homo sapiens GN=MYH11 PE=1 SV=3 | 97 | 228054 | 2 | 1.20 | 2.3 |
| 65 | DKK3_HUMAN | Dickkopf-related protein 3 OS=Homo sapiens GN=DKK3 PE=1 SV=2 | 379 | 39733 | 6 | 1.19 | 2.3 |
| 66 | BGH3_HUMAN | Transforming growth factor-beta-induced protein ig-h3 OS=Homo sapiens GN=TGFBI PE=1 SV=1 | 2809 | 75261 | 23 | 1.18 | 2.3 |
| 67 | ILEU_HUMAN | Leukocyte elastase inhibitor OS=Homo sapiens GN=SERPINB1 PE=1 SV=1 | 388 | 42829 | 5 | 1.15 | 2.2 |
| 68 | UFC1_HUMAN | Ubiquitin-fold modifier-conjugating enzyme 1 OS=Homo sapiens GN=UFC1 PE=1 SV=3 | 97 | 19617 | 1 | 1.13 | 2.2 |
| 69 | SH3L1_HUMAN | SH3 domain-binding glutamic acid-rich-like protein OS=Homo sapiens GN=SH3BGRL PE=1 SV=1 | 67 | 12766 | 1 | 1.10 | 2.1 |
| 70 | RCN1_HUMAN | Reticulocalbin-1 OS=Homo sapiens GN=RCN1 PE=1 SV=1 | 73 | 38866 | 2 | 1.09 | 2.1 |
| 71 | LAMB1_HUMAN | Laminin subunit beta-1 OS=Homo sapiens GN=LAMB1 PE=1 SV=2 | 1096 | 205150 | 20 | 1.08 | 2.1 |
| 72 | ERF1_HUMAN | Eukaryotic peptide chain release factor subunit 1 OS=Homo sapiens GN=ETF1 PE=1 SV=3 | 375 | 49228 | 7 | 1.06 | 2.1 |
| 73 | KYNU_HUMAN | Kynureninase OS=Homo sapiens GN=KYNU PE=1 SV=1 | 62 | 53232 | 1 | 1.06 | 2.1 |
| 74 | CHM4B_HUMAN | Charged multivesicular body protein 4b OS=Homo sapiens GN=CHMP4B PE=1 SV=1 | 94 | 24935 | 2 | 1.02 | 2.0 |
| 75 | TBCA_HUMAN | Tubulin-specific chaperone A OS=Homo sapiens GN=TBCA PE=1 SV=3 | 112 | 12904 | 4 | 1.02 | 2.0 |
| 76 | EHD2_HUMAN | EH domain-containing protein 2 OS=Homo sapiens GN=EHD2 PE=1 SV=2 | 59 | 61294 | 1 | 1.01 | 2.0 |
| 77 | OFUT1_HUMAN | GDP-fucose protein O-fucosyltransferase 1 OS=Homo sapiens GN=POFUT1 PE=1 SV=1 | 75 | 44383 | 2 | 1.01 | 2.0 |
| 78 | BID_HUMAN | BH3-interacting domain death agonist OS=Homo sapiens GN=BID PE=1 SV=1 | 65 | 22293 | 1 | 1.00 | 2.0 |
| 79 | LAMA5_HUMAN | Laminin subunit alpha-5 OS=Homo sapiens GN=LAMA5 PE=1 SV=8 | 4890 | 412023 | 76 | 1.00 | 2.0 |
| 80 | PXDN_HUMAN | Peroxidasin homolog OS=Homo sapiens GN=PXDN PE=1 SV=2 | 2721 | 167793 | 34 | 1.00 | 2.0 |
|  | | | | | | | |
| **Down-regulated secreted proteins from A431-V cells identified by SILAC** | | | | | | | |
|  | **Accession** | **Description** | **Score** | **Mass**  **(Da)** | **# H/L** | **Log2 (H/L)** | **Ratio** |
| 1 | PGRC2_HUMAN | Membrane-associated progesterone receptor component 2 OS=Homo sapiens GN=PGRMC2 PE=1 SV=1 | 57 | 23861 | 1 | -1.00 | 0.500 |
| 2 | LAP2A_HUMAN | Lamina-associated polypeptide 2, isoform alpha OS=Homo sapiens GN=TMPO PE=1 SV=2 | 157 | 76016 | 2 | -1.01 | 0.497 |
| 3 | BCCIP_HUMAN | BRCA2 and CDKN1A-interacting protein OS=Homo sapiens GN=BCCIP PE=1 SV=1 | 62 | 36000 | 3 | -1.02 | 0.494 |
| 4 | CATH_HUMAN | Pro-cathepsin H OS=Homo sapiens GN=CTSH PE=1 SV=4 | 945 | 37400 | 10 | -1.02 | 0.494 |
| 5 | CHCH2_HUMAN | Coiled-coil-helix-coiled-coil-helix domain-containing protein 2, mitochondrial OS=Homo sapiens GN=CHCHD2 PE=1 SV=1 | 172 | 15731 | 1 | -1.02 | 0.492 |
| 6 | LUM_HUMAN | Lumican OS=Homo sapiens GN=LUM PE=1 SV=2 | 96 | 38747 | 2 | -1.03 | 0.491 |
| 7 | SRSF9_HUMAN | Serine/arginine-rich splicing factor 9 OS=Homo sapiens GN=SRSF9 PE=1 SV=1 | 92 | 25885 | 3 | -1.05 | 0.483 |
| 8 | SYAC_HUMAN | Alanine--tRNA ligase, cytoplasmic OS=Homo sapiens GN=AARS PE=1 SV=2 | 280 | 107485 | 3 | -1.06 | 0.481 |
| 9 | BLVRB_HUMAN | Flavin reductase (NADPH) OS=Homo sapiens GN=BLVRB PE=1 SV=3 | 346 | 22219 | 3 | -1.06 | 0.481 |
| 10 | DHE3_HUMAN | Glutamate dehydrogenase 1, mitochondrial OS=Homo sapiens GN=GLUD1 PE=1 SV=2 | 440 | 61701 | 7 | -1.07 | 0.475 |
| 11 | CADH1_HUMAN | Cadherin-1 OS=Homo sapiens GN=CDH1 PE=1 SV=3 | 319 | 97852 | 5 | -1.08 | 0.474 |
| 12 | ANX11_HUMAN | Annexin A11 OS=Homo sapiens GN=ANXA11 PE=1 SV=1 | 348 | 54697 | 5 | -1.08 | 0.473 |
| 13 | PHS_HUMAN | Pterin-4-alpha-carbinolamine dehydratase OS=Homo sapiens GN=PCBD1 PE=1 SV=2 | 85 | 12049 | 2 | -1.08 | 0.472 |
| 14 | VASP_HUMAN | Vasodilator-stimulated phosphoprotein OS=Homo sapiens GN=VASP PE=1 SV=3 | 127 | 39976 | 3 | -1.08 | 0.472 |
| 15 | CNTN1_HUMAN | Contactin-1 OS=Homo sapiens GN=CNTN1 PE=1 SV=1 | 199 | 114104 | 2 | -1.10 | 0.468 |
| 16 | CSPG4_HUMAN | Chondroitin sulfate proteoglycan 4 OS=Homo sapiens GN=CSPG4 PE=1 SV=2 | 400 | 252178 | 15 | -1.10 | 0.468 |
| 17 | N2DL3_HUMAN | NKG2D ligand 3 OS=Homo sapiens GN=ULBP3 PE=1 SV=1 | 202 | 28273 | 6 | -1.10 | 0.468 |
| 18 | LICH_HUMAN | Lysosomal acid lipase/cholesteryl ester hydrolase OS=Homo sapiens GN=LIPA PE=1 SV=2 | 204 | 45789 | 3 | -1.10 | 0.465 |
| 19 | STX4_HUMAN | Syntaxin-4 OS=Homo sapiens GN=STX4 PE=1 SV=2 | 132 | 34273 | 1 | -1.11 | 0.462 |
| 20 | PTPRS_HUMAN | Receptor-type tyrosine-protein phosphatase S OS=Homo sapiens GN=PTPRS PE=1 SV=3 | 599 | 218159 | 12 | -1.12 | 0.460 |
| 21 | RL18_HUMAN | 60S ribosomal protein L18 OS=Homo sapiens GN=RPL18 PE=1 SV=2 | 169 | 21735 | 2 | -1.12 | 0.460 |
| 22 | FUCO_HUMAN | Tissue alpha-L-fucosidase OS=Homo sapiens GN=FUCA1 PE=1 SV=4 | 61 | 54267 | 1 | -1.12 | 0.459 |
| 23 | RL35A_HUMAN | 60S ribosomal protein L35a OS=Homo sapiens GN=RPL35A PE=1 SV=2 | 115 | 12587 | 3 | -1.12 | 0.459 |
| 24 | IF2B_HUMAN | Eukaryotic translation initiation factor 2 subunit 2 OS=Homo sapiens GN=EIF2S2 PE=1 SV=2 | 230 | 38707 | 2 | -1.13 | 0.458 |
| 25 | NHRF1_HUMAN | Na(+)/H(+) exchange regulatory cofactor NHE-RF1 OS=Homo sapiens GN=SLC9A3R1 PE=1 SV=4 | 160 | 39130 | 2 | -1.13 | 0.457 |
| 26 | PAK2_HUMAN | Serine/threonine-protein kinase PAK 2 OS=Homo sapiens GN=PAK2 PE=1 SV=3 | 122 | 58291 | 1 | -1.13 | 0.457 |
| 27 | CO4A2_HUMAN | Collagen alpha-2(IV) chain OS=Homo sapiens GN=COL4A2 PE=1 SV=4 | 145 | 168646 | 2 | -1.14 | 0.454 |
| 28 | DLK2_HUMAN | Protein delta homolog 2 OS=Homo sapiens GN=DLK2 PE=2 SV=1 | 53 | 43143 | 1 | -1.16 | 0.449 |
| 29 | PLBL2_HUMAN | Putative phospholipase B-like 2 OS=Homo sapiens GN=PLBD2 PE=1 SV=2 | 64 | 65886 | 3 | -1.16 | 0.447 |
| 30 | DD19A_HUMAN | ATP-dependent RNA helicase DDX19A OS=Homo sapiens GN=DDX19A PE=1 SV=1 | 60 | 54397 | 1 | -1.17 | 0.444 |
| 31 | CATL1_HUMAN | Cathepsin L1 OS=Homo sapiens GN=CTSL1 PE=1 SV=2 | 152 | 37500 | 4 | -1.18 | 0.441 |
| 32 | CADH3_HUMAN | Cadherin-3 OS=Homo sapiens GN=CDH3 PE=1 SV=2 | 263 | 91875 | 3 | -1.20 | 0.436 |
| 33 | LYPD3_HUMAN | Ly6/PLAUR domain-containing protein 3 OS=Homo sapiens GN=LYPD3 PE=1 SV=2 | 372 | 37031 | 4 | -1.20 | 0.434 |
| 34 | SARG_HUMAN | Specifically androgen-regulated gene protein OS=Homo sapiens GN=SARG PE=1 SV=2 | 75 | 64211 | 1 | -1.21 | 0.431 |
| 35 | CCD80_HUMAN | Coiled-coil domain-containing protein 80 OS=Homo sapiens GN=CCDC80 PE=1 SV=1 | 495 | 108505 | 9 | -1.23 | 0.428 |
| 36 | MMP13_HUMAN | Collagenase 3 OS=Homo sapiens GN=MMP13 PE=1 SV=1 | 532 | 54014 | 8 | -1.23 | 0.428 |
| 37 | MYOF_HUMAN | Myoferlin OS=Homo sapiens GN=MYOF PE=1 SV=1 | 308 | 236100 | 6 | -1.23 | 0.428 |
| 38 | NMU_HUMAN | Neuromedin-U OS=Homo sapiens GN=NMU PE=2 SV=1 | 129 | 20013 | 3 | -1.25 | 0.420 |
| 39 | CLUS_HUMAN | Clusterin OS=Homo sapiens GN=CLU PE=1 SV=1 | 1031 | 52500 | 18 | -1.27 | 0.414 |
| 40 | MCP_HUMAN | Membrane cofactor protein OS=Homo sapiens GN=CD46 PE=1 SV=3 | 86 | 44745 | 2 | -1.28 | 0.411 |
| 41 | NID1_HUMAN | Nidogen-1 OS=Homo sapiens GN=NID1 PE=1 SV=3 | 784 | 139142 | 20 | -1.29 | 0.409 |
| 42 | GDIR2_HUMAN | Rho GDP-dissociation inhibitor 2 OS=Homo sapiens GN=ARHGDIB PE=1 SV=3 | 83 | 23031 | 2 | -1.29 | 0.408 |
| 43 | TNFL9_HUMAN | Tumor necrosis factor ligand superfamily member 9 OS=Homo sapiens GN=TNFSF9 PE=1 SV=1 | 111 | 26779 | 3 | -1.31 | 0.403 |
| 44 | CSN8_HUMAN | COP9 signalosome complex subunit 8 OS=Homo sapiens GN=COPS8 PE=1 SV=1 | 101 | 23268 | 2 | -1.32 | 0.401 |
| 45 | TM9S2_HUMAN | Transmembrane 9 superfamily member 2 OS=Homo sapiens GN=TM9SF2 PE=1 SV=1 | 308 | 76809 | 6 | -1.32 | 0.401 |
| 46 | 1A25_HUMAN | HLA class I histocompatibility antigen, A-25 alpha chain OS=Homo sapiens GN=HLA-A PE=2 SV=1 | 187 | 41477 | 3 | -1.35 | 0.393 |
| 47 | NXN_HUMAN | Nucleoredoxin OS=Homo sapiens GN=NXN PE=1 SV=2 | 163 | 48761 | 2 | -1.35 | 0.392 |
| 48 | CATD_HUMAN | Cathepsin D OS=Homo sapiens GN=CTSD PE=1 SV=1 | 1724 | 45037 | 15 | -1.36 | 0.390 |
| 49 | DKK1_HUMAN | Dickkopf-related protein 1 OS=Homo sapiens GN=DKK1 PE=1 SV=1 | 436 | 28700 | 9 | -1.37 | 0.387 |
| 50 | ECM1_HUMAN | Extracellular matrix protein 1 OS=Homo sapiens GN=ECM1 PE=1 SV=2 | 984 | 62581 | 17 | -1.37 | 0.386 |
| 51 | TAGL_HUMAN | Transgelin OS=Homo sapiens GN=TAGLN PE=1 SV=4 | 94 | 22653 | 2 | -1.38 | 0.384 |
| 52 | RENT1_HUMAN | Regulator of nonsense transcripts 1 OS=Homo sapiens GN=UPF1 PE=1 SV=2 | 85 | 125578 | 2 | -1.39 | 0.382 |
| 53 | NQO1_HUMAN | NAD(P)H dehydrogenase [quinone] 1 OS=Homo sapiens GN=NQO1 PE=1 SV=1 | 167 | 30905 | 2 | -1.39 | 0.381 |
| 54 | 1B15_HUMAN | HLA class I histocompatibility antigen, B-15 alpha chain OS=Homo sapiens GN=HLA-B PE=1 SV=2 | 138 | 40648 | 6 | -1.43 | 0.370 |
| 55 | 1B55_HUMAN | HLA class I histocompatibility antigen, B-55 alpha chain OS=Homo sapiens GN=HLA-B PE=1 SV=1 | 138 | 40756 | 6 | -1.43 | 0.370 |
| 56 | NETO2_HUMAN | Neuropilin and tolloid-like protein 2 OS=Homo sapiens GN=NETO2 PE=1 SV=1 | 193 | 60495 | 3 | -1.43 | 0.370 |
| 57 | LEG3_HUMAN | Galectin-3 OS=Homo sapiens GN=LGALS3 PE=1 SV=5 | 312 | 26193 | 6 | -1.44 | 0.369 |
| 58 | ARF6_HUMAN | ADP-ribosylation factor 6 OS=Homo sapiens GN=ARF6 PE=1 SV=2 | 170 | 20183 | 4 | -1.45 | 0.365 |
| 59 | SYWC_HUMAN | Tryptophan--tRNA ligase, cytoplasmic OS=Homo sapiens GN=WARS PE=1 SV=2 | 513 | 53474 | 7 | -1.46 | 0.363 |
| 60 | SPON2_HUMAN | Spondin-2 OS=Homo sapiens GN=SPON2 PE=1 SV=3 | 126 | 35800 | 2 | -1.47 | 0.361 |
| 61 | CP013_HUMAN | UPF0585 protein C16orf13 OS=Homo sapiens GN=C16orf13 PE=1 SV=2 | 91 | 22849 | 2 | -1.47 | 0.360 |
| 62 | SEM3A_HUMAN | Semaphorin-3A OS=Homo sapiens GN=SEMA3A PE=2 SV=1 | 323 | 89916 | 6 | -1.48 | 0.360 |
| 63 | LCAP_HUMAN | Leucyl-cystinyl aminopeptidase OS=Homo sapiens GN=LNPEP PE=1 SV=3 | 172 | 117787 | 6 | -1.48 | 0.357 |
| 64 | LYAG_HUMAN | Lysosomal alpha-glucosidase OS=Homo sapiens GN=GAA PE=1 SV=4 | 113 | 106112 | 2 | -1.49 | 0.357 |
| 65 | NID2_HUMAN | Nidogen-2 OS=Homo sapiens GN=NID2 PE=1 SV=3 | 61 | 153952 | 1 | -1.49 | 0.355 |
| 66 | ITM2B_HUMAN | Integral membrane protein 2B OS=Homo sapiens GN=ITM2B PE=1 SV=1 | 316 | 30832 | 5 | -1.55 | 0.342 |
| 67 | 1A32_HUMAN | HLA class I histocompatibility antigen, A-32 alpha chain OS=Homo sapiens GN=HLA-A PE=2 SV=2 | 192 | 41307 | 2 | -1.59 | 0.333 |
| 68 | JAM1_HUMAN | Junctional adhesion molecule A OS=Homo sapiens GN=F11R PE=1 SV=1 | 181 | 32962 | 2 | -1.63 | 0.323 |
| 69 | FUS_HUMAN | RNA-binding protein FUS OS=Homo sapiens GN=FUS PE=1 SV=1 | 122 | 53622 | 1 | -1.66 | 0.317 |
| 70 | RU2A_HUMAN | U2 small nuclear ribonucleoprotein A' OS=Homo sapiens GN=SNRPA1 PE=1 SV=2 | 87 | 28512 | 4 | -1.72 | 0.303 |
| 71 | UGDH_HUMAN | UDP-glucose 6-dehydrogenase OS=Homo sapiens GN=UGDH PE=1 SV=1 | 51 | 55674 | 2 | -1.75 | 0.298 |
| 72 | IF4B_HUMAN | Eukaryotic translation initiation factor 4B OS=Homo sapiens GN=EIF4B PE=1 SV=2 | 55 | 69167 | 1 | -1.90 | 0.269 |
| 73 | 5NTC_HUMAN | Cytosolic purine 5'-nucleotidase OS=Homo sapiens GN=NT5C2 PE=1 SV=1 | 63 | 65384 | 1 | -1.94 | 0.261 |
| 74 | RTN4R_HUMAN | Reticulon-4 receptor OS=Homo sapiens GN=RTN4R PE=1 SV=1 | 55 | 51588 | 2 | -1.96 | 0.257 |
| 75 | CLIC3_HUMAN | Chloride intracellular channel protein 3 OS=Homo sapiens GN=CLIC3 PE=1 SV=2 | 135 | 26917 | 2 | -2.02 | 0.247 |
| 76 | HMGA2_HUMAN | High mobility group protein HMGI-C OS=Homo sapiens GN=HMGA2 PE=1 SV=1 | 181 | 11825 | 1 | -2.08 | 0.237 |
| 77 | PPBN_HUMAN | Alkaline phosphatase, placental-like OS=Homo sapiens GN=ALPPL2 PE=1 SV=4 | 91 | 57626 | 1 | -2.12 | 0.231 |
| 78 | EPHA1_HUMAN | Ephrin type-A receptor 1 OS=Homo sapiens GN=EPHA1 PE=1 SV=4 | 143 | 109712 | 2 | -2.14 | 0.227 |
| 79 | AL3A1_HUMAN | Aldehyde dehydrogenase, dimeric NADP-preferring OS=Homo sapiens GN=ALDH3A1 PE=1 SV=3 | 60 | 50762 | 1 | -2.17 | 0.222 |
| 80 | LSP1_HUMAN | Lymphocyte-specific protein 1 OS=Homo sapiens GN=LSP1 PE=1 SV=1 | 87 | 37397 | 1 | -2.29 | 0.205 |
| 81 | PPT2_HUMAN | Lysosomal thioesterase PPT2 OS=Homo sapiens GN=PPT2 PE=1 SV=4 | 126 | 34602 | 2 | -2.33 | 0.199 |
| 82 | NB5R3_HUMAN | NADH-cytochrome b5 reductase 3 OS=Homo sapiens GN=CYB5R3 PE=1 SV=3 | 52 | 34441 | 2 | -2.37 | 0.193 |
| 83 | MMP14_HUMAN | Matrix metalloproteinase-14 OS=Homo sapiens GN=MMP14 PE=1 SV=3 | 198 | 66194 | 3 | -2.47 | 0.180 |
| 84 | SBSN_HUMAN | Suprabasin OS=Homo sapiens GN=SBSN PE=2 SV=1 | 170 | 25377 | 2 | -2.50 | 0.176 |
| 85 | THRB_HUMAN | Prothrombin OS=Homo sapiens GN=F2 PE=1 SV=2 | 91 | 71475 | 2 | -2.72 | 0.152 |
| 86 | TETN_HUMAN | Tetranectin OS=Homo sapiens GN=CLEC3B PE=1 SV=3 | 72 | 22921 | 1 | -2.78 | 0.146 |
| 87 | MXRA5_HUMAN | Matrix-remodeling-associated protein 5 OS=Homo sapiens GN=MXRA5 PE=2 SV=3 | 58 | 314065 | 1 | -2.90 | 0.134 |
| 88 | SEM5A_HUMAN | Semaphorin-5A OS=Homo sapiens GN=SEMA5A PE=1 SV=3 | 90 | 124072 | 1 | -2.90 | 0.134 |
| 89 | ZG16B_HUMAN | Zymogen granule protein 16 homolog B OS=Homo sapiens GN=ZG16B PE=1 SV=3 | 55 | 22725 | 1 | -2.90 | 0.134 |
| 90 | VTNC_HUMAN | Vitronectin OS=Homo sapiens GN=VTN PE=1 SV=1 | 122 | 55069 | 1 | -3.03 | 0.123 |
| 91 | CRIP2_HUMAN | Cysteine-rich protein 2 OS=Homo sapiens GN=CRIP2 PE=1 SV=1 | 319 | 23276 | 3 | -3.03 | 0.123 |
| 92 | FILA_HUMAN | Filaggrin OS=Homo sapiens GN=FLG PE=1 SV=3 | 336 | 435036 | 5 | -3.39 | 0.095 |
| 93 | ABP1_HUMAN | Amiloride-sensitive amine oxidase [copper-containing] OS=Homo sapiens GN=ABP1 PE=1 SV=4 | 298 | 85723 | 6 | -3.40 | 0.095 |
| 94 | HORN_HUMAN | Hornerin OS=Homo sapiens GN=HRNR PE=1 SV=2 | 438 | 284280 | 3 | -5.23 | 0.027 |
| 95 | HBA_HUMAN | Hemoglobin subunit alpha OS=Homo sapiens GN=HBA1 PE=1 SV=2 | 178 | 15305 | 2 | -7.20 | 0.007 |
| 96 | GFAP_HUMAN | Glial fibrillary acidic protein OS=Homo sapiens GN=GFAP PE=1 SV=1 | 58 | 49907 | 1 | -9.05 | 0.002 |
| 97 | SRXN1_HUMAN | Sulfiredoxin-1 OS=Homo sapiens GN=SRXN1 PE=1 SV=2 | 52 | 14307 | 3 | -10.32 | 0.001 |
| 98 | ANT3_HUMAN | Antithrombin-III OS=Homo sapiens GN=SERPINC1 PE=1 SV=1 | 144 | 53025 | 4 | -10.87 | 0.001 |

**Table S2. Cytokine concentrations determined by Luminex using Human cytokine/chemokine 42plex kit**
